# Supplementary material
Source: publisher figshare collection journal article supplement (https://acs.figshare.com/ndownloader/files/5799777)
Supplement: Supplementary file 1 [file 5799777]

  
data_ic16817 
  
_audit_creation_method            SHELXL-97 
_chemical_name_systematic 
; 
 ? 
; 
_chemical_name_common             ? 
_chemical_melting_point           ? 
_chemical_formula_moiety          ? 
_chemical_formula_sum 
 'C16 H30 N2 O7 S' 
_chemical_formula_weight          394.48 
  
loop_ 
 _atom_type_symbol 
 _atom_type_description 
 _atom_type_scat_dispersion_real 
 _atom_type_scat_dispersion_imag 
 _atom_type_scat_source 
 'C'  'C'   0.0181   0.0091 
 'International Tables Vol C Tables 4.2.6.8 and 6.1.1.4' 
 'H'  'H'   0.0000   0.0000 
 'International Tables Vol C Tables 4.2.6.8 and 6.1.1.4' 
 'N'  'N'   0.0311   0.0180 
 'International Tables Vol C Tables 4.2.6.8 and 6.1.1.4' 
 'O'  'O'   0.0492   0.0322 
 'International Tables Vol C Tables 4.2.6.8 and 6.1.1.4' 
 'S'  'S'   0.3331   0.5567 
 'International Tables Vol C Tables 4.2.6.8 and 6.1.1.4' 
  
_symmetry_cell_setting            Orthorhombic 
_symmetry_space_group_name_H-M    P2(1)2(1)2(1) 
  
loop_ 
 _symmetry_equiv_pos_as_xyz 
 'x, y, z' 
 '-x+1/2, -y, z+1/2' 
 '-x, y+1/2, -z+1/2' 
 'x+1/2, -y+1/2, -z' 
  
_cell_length_a                    10.1789(3) 
_cell_length_b                    11.9132(4) 
_cell_length_c                    18.0755(7) 
_cell_angle_alpha                 90.00 
_cell_angle_beta                  90.00 
_cell_angle_gamma                 90.00 
_cell_volume                      2191.89(13) 
_cell_formula_units_Z             4 
_cell_measurement_temperature     295(2) 
_cell_measurement_reflns_used     2275 
_cell_measurement_theta_min       4.4370 
_cell_measurement_theta_max       73.5100 
  
_exptl_crystal_description        needle 
_exptl_crystal_colour             colorless 
_exptl_crystal_size_max           0.20 
_exptl_crystal_size_mid           0.15 
_exptl_crystal_size_min           0.10 
_exptl_crystal_density_meas       ? 
_exptl_crystal_density_diffrn     1.195 
_exptl_crystal_density_method     'not measured' 
_exptl_crystal_F_000              848 
_exptl_absorpt_coefficient_mu     1.625 
_exptl_absorpt_correction_type    multi-scan 
_exptl_absorpt_correction_T_min   0.92074 
_exptl_absorpt_correction_T_max   1.00000 
_exptl_absorpt_process_details 
; 
CrysAlisPro, Agilent Technologies, 
Version 1.171.37.31 (release 14-01-2014 CrysAlis171 .NET) 
(compiled Jan 14 2014,18:38:05) 
Empirical absorption correction using spherical harmonics, 
 implemented in SCALE3 ABSPACK scaling algorithm. 
; 
  
_exptl_special_details 
; 
 ? 
; 
  
_diffrn_ambient_temperature       295(2) 
_diffrn_radiation_wavelength      1.54178 
_diffrn_radiation_type            CuK\a 
_diffrn_radiation_source          'fine-focus sealed tube' 
_diffrn_radiation_monochromator   graphite 
_diffrn_measurement_device_type   'Oxford Diffraction Gemini A' 
_diffrn_measurement_method        CCD 
_diffrn_detector_area_resol_mean  ? 
_diffrn_standards_number          ? 
_diffrn_standards_interval_count  ? 
_diffrn_standards_interval_time   ? 
_diffrn_standards_decay_%         ? 
_diffrn_reflns_number             7403 
_diffrn_reflns_av_R_equivalents   0.0367 
_diffrn_reflns_av_sigmaI/netI     0.0516 
_diffrn_reflns_limit_h_min        -12 
_diffrn_reflns_limit_h_max        7 
_diffrn_reflns_limit_k_min        -14 
_diffrn_reflns_limit_k_max        14 
_diffrn_reflns_limit_l_min        -19 
_diffrn_reflns_limit_l_max        21 
_diffrn_reflns_theta_min          4.44 
_diffrn_reflns_theta_max          67.96 
_reflns_number_total              3984 
_reflns_number_gt                 3363 
_reflns_threshold_expression      >2sigma(I) 
  
_computing_data_collection 
; 
CrysAlisPro, Agilent Technologies, 
Version 1.171.37.31 (release 14-01-2014 CrysAlis171 .NET) 
(compiled Jan 14 2014,18:38:05) 
Empirical absorption correction using spherical harmonics, 
 implemented in SCALE3 ABSPACK scaling algorithm. 
; 
_computing_cell_refinement 
; 
CrysAlisPro, Agilent Technologies, 
Version 1.171.37.31 (release 14-01-2014 CrysAlis171 .NET) 
(compiled Jan 14 2014,18:38:05) 
Empirical absorption correction using spherical harmonics, 
 implemented in SCALE3 ABSPACK scaling algorithm. 
; 
_computing_data_reduction 
; 
CrysAlisPro, Agilent Technologies, 
Version 1.171.37.31 (release 14-01-2014 CrysAlis171 .NET) 
(compiled Jan 14 2014,18:38:05) 
Empirical absorption correction using spherical harmonics, 
 implemented in SCALE3 ABSPACK scaling algorithm. 
; 
_computing_structure_solution     'SHELXS-97 (Sheldrick, 1990)' 
_computing_structure_refinement   'SHELXL-97 (Sheldrick, 1997)' 
_computing_molecular_graphics     SHELXTL 
_computing_publication_material   SHELXTL 
  
_refine_special_details 
; 
 Refinement of F^2^ against ALL reflections.  The weighted R-factor wR and 
 goodness of fit S are based on F^2^, conventional R-factors R are based 
 on F, with F set to zero for negative F^2^. The threshold expression of 
 F^2^ > 2sigma(F^2^) is used only for calculating R-factors(gt) etc. and is 
 not relevant to the choice of reflections for refinement.  R-factors based 
 on F^2^ are statistically about twice as large as those based on F, and R- 
 factors based on ALL data will be even larger. 
; 
  
_refine_ls_structure_factor_coef  Fsqd 
_refine_ls_matrix_type            full 
_refine_ls_weighting_scheme       calc 
_refine_ls_weighting_details 
 'calc w=1/[\s^2^(Fo^2^)+(0.0725P)^2^+0.0000P] where P=(Fo^2^+2Fc^2^)/3' 
_atom_sites_solution_primary      direct 
_atom_sites_solution_secondary    difmap 
_atom_sites_solution_hydrogens    geom 
_refine_ls_hydrogen_treatment     mixed 
_refine_ls_extinction_method      none 
_refine_ls_extinction_coef        ? 
_refine_ls_abs_structure_details 
 'Flack H D (1983), Acta Cryst. A39, 876-881' 
_refine_ls_abs_structure_Flack    -0.05(3) 
_refine_ls_number_reflns          3984 
_refine_ls_number_parameters      239 
_refine_ls_number_restraints      0 
_refine_ls_R_factor_all           0.0605 
_refine_ls_R_factor_gt            0.0497 
_refine_ls_wR_factor_ref          0.1360 
_refine_ls_wR_factor_gt           0.1257 
_refine_ls_goodness_of_fit_ref    1.021 
_refine_ls_restrained_S_all       1.021 
_refine_ls_shift/su_max           0.022 
_refine_ls_shift/su_mean          0.002 
  
loop_ 
 _atom_site_label 
 _atom_site_type_symbol 
 _atom_site_fract_x 
 _atom_site_fract_y 
 _atom_site_fract_z 
 _atom_site_U_iso_or_equiv 
 _atom_site_adp_type 
 _atom_site_occupancy 
 _atom_site_symmetry_multiplicity 
 _atom_site_calc_flag 
 _atom_site_refinement_flags 
 _atom_site_disorder_assembly 
 _atom_site_disorder_group 
S1 S 0.02729(6) 0.21742(6) 0.94238(4) 0.04862(18) Uani 1 1 d . . . 
O1 O 0.1466(3) 0.3500(2) 1.27541(12) 0.0675(6) Uani 1 1 d . . . 
O2 O 0.2289(3) 0.3392(2) 1.15822(12) 0.0669(6) Uani 1 1 d . . . 
O3 O -0.0002(2) 0.55433(19) 1.09467(15) 0.0645(6) Uani 1 1 d . . . 
O4 O 0.1748(3) 0.5975(2) 1.02015(15) 0.0754(8) Uani 1 1 d . . . 
O5 O 0.0754(7) 0.4422(6) 0.7992(3) 0.188(4) Uani 1 1 d . . . 
O6 O 0.2650(9) 0.3638(4) 0.7876(3) 0.188(3) Uani 1 1 d . . . 
O7 O -0.0544(2) 0.1943(2) 1.00883(15) 0.0673(6) Uani 1 1 d . . . 
N1 N 0.1503(3) 0.3027(2) 0.96107(15) 0.0542(6) Uani 1 1 d . . . 
N2 N 0.1807(8) 0.4218(4) 0.8210(2) 0.128(2) Uani 1 1 d . . . 
C1 C 0.0647(4) 0.4157(4) 1.22978(19) 0.0662(9) Uani 1 1 d . . . 
H1A H 0.0395 0.4849 1.2542 0.079 Uiso 1 1 calc R . . 
H1B H -0.0138 0.3748 1.2156 0.079 Uiso 1 1 calc R . . 
C2 C 0.1514(3) 0.4385(3) 1.16356(16) 0.0516(7) Uani 1 1 d . . . 
H2A H 0.2084 0.5029 1.1739 0.062 Uiso 1 1 calc R . . 
C3 C 0.0804(3) 0.4565(3) 1.09081(17) 0.0498(6) Uani 1 1 d . . . 
H3A H 0.0261 0.3909 1.0794 0.060 Uiso 1 1 calc R . . 
C4 C 0.1728(3) 0.4804(3) 1.02658(17) 0.0521(7) Uani 1 1 d . . . 
H4A H 0.2610 0.4552 1.0405 0.062 Uiso 1 1 calc R . . 
C5 C 0.1349(3) 0.4229(3) 0.95407(16) 0.0512(7) Uani 1 1 d . . . 
H5A H 0.0433 0.4404 0.9422 0.061 Uiso 1 1 calc R . . 
C6 C 0.2237(5) 0.4678(3) 0.89319(19) 0.0749(11) Uani 1 1 d . . . 
H6A H 0.2194 0.5492 0.8921 0.090 Uiso 1 1 calc R . . 
H6B H 0.3140 0.4461 0.9028 0.090 Uiso 1 1 calc R . . 
C7 C 0.2213(4) 0.2795(3) 1.22666(19) 0.0676(9) Uani 1 1 d . . . 
C8 C 0.1522(8) 0.1703(4) 1.2148(3) 0.120(2) Uani 1 1 d . . . 
H8A H 0.0668 0.1840 1.1942 0.180 Uiso 1 1 calc R . . 
H8B H 0.1432 0.1320 1.2612 0.180 Uiso 1 1 calc R . . 
H8C H 0.2023 0.1246 1.1813 0.180 Uiso 1 1 calc R . . 
C9 C 0.3567(5) 0.2693(5) 1.2590(3) 0.1022(17) Uani 1 1 d . . . 
H9A H 0.3943 0.3427 1.2646 0.153 Uiso 1 1 calc R . . 
H9B H 0.4108 0.2253 1.2265 0.153 Uiso 1 1 calc R . . 
H9C H 0.3516 0.2333 1.3064 0.153 Uiso 1 1 calc R . . 
C10 C 0.0627(4) 0.6456(3) 1.0568(2) 0.0691(9) Uani 1 1 d . . . 
C11 C 0.1142(5) 0.7306(4) 1.1113(3) 0.0956(15) Uani 1 1 d . . . 
H11A H 0.1737 0.6946 1.1450 0.143 Uiso 1 1 calc R . . 
H11B H 0.0421 0.7623 1.1385 0.143 Uiso 1 1 calc R . . 
H11C H 0.1595 0.7891 1.0852 0.143 Uiso 1 1 calc R . . 
C12 C -0.0312(7) 0.6905(5) 1.0002(4) 0.133(2) Uani 1 1 d . . . 
H12A H -0.0584 0.6308 0.9680 0.199 Uiso 1 1 calc R . . 
H12B H 0.0112 0.7480 0.9717 0.199 Uiso 1 1 calc R . . 
H12C H -0.1068 0.7214 1.0246 0.199 Uiso 1 1 calc R . . 
C13 C 0.1265(3) 0.0890(3) 0.9266(2) 0.0598(8) Uani 1 1 d . . . 
C14 C 0.2144(5) 0.1090(4) 0.8604(3) 0.0905(14) Uani 1 1 d . . . 
H14A H 0.2667 0.0433 0.8515 0.136 Uiso 1 1 calc R . . 
H14B H 0.2709 0.1718 0.8700 0.136 Uiso 1 1 calc R . . 
H14C H 0.1613 0.1244 0.8177 0.136 Uiso 1 1 calc R . . 
C15 C 0.0252(4) -0.0021(3) 0.9088(3) 0.0850(13) Uani 1 1 d . . . 
H15A H 0.0696 -0.0719 0.8999 0.128 Uiso 1 1 calc R . . 
H15B H -0.0236 0.0191 0.8656 0.128 Uiso 1 1 calc R . . 
H15C H -0.0337 -0.0106 0.9499 0.128 Uiso 1 1 calc R . . 
C16 C 0.2029(5) 0.0592(4) 0.9961(3) 0.0860(12) Uani 1 1 d . . . 
H16A H 0.2541 -0.0071 0.9873 0.129 Uiso 1 1 calc R . . 
H16B H 0.1426 0.0457 1.0360 0.129 Uiso 1 1 calc R . . 
H16C H 0.2601 0.1202 1.0089 0.129 Uiso 1 1 calc R . . 
H1 H 0.212(4) 0.284(3) 0.9804(19) 0.051(10) Uiso 1 1 d . . . 
  
loop_ 
 _atom_site_aniso_label 
 _atom_site_aniso_U_11 
 _atom_site_aniso_U_22 
 _atom_site_aniso_U_33 
 _atom_site_aniso_U_23 
 _atom_site_aniso_U_13 
 _atom_site_aniso_U_12 
S1 0.0391(3) 0.0467(3) 0.0601(4) -0.0034(3) 0.0008(3) 0.0003(3) 
O1 0.0730(15) 0.0828(16) 0.0468(11) 0.0105(11) 0.0035(11) 0.0039(13) 
O2 0.0744(15) 0.0737(14) 0.0526(12) 0.0139(11) 0.0106(11) 0.0232(12) 
O3 0.0538(13) 0.0557(12) 0.0840(15) 0.0202(11) 0.0081(11) 0.0036(9) 
O4 0.098(2) 0.0538(12) 0.0742(15) -0.0035(11) 0.0288(14) -0.0216(13) 
O5 0.264(7) 0.203(6) 0.097(3) 0.050(4) -0.089(5) -0.141(6) 
O6 0.370(11) 0.117(3) 0.077(2) -0.016(2) 0.076(4) -0.050(5) 
O7 0.0584(13) 0.0607(13) 0.0829(15) -0.0048(12) 0.0186(12) -0.0008(10) 
N1 0.0421(12) 0.0566(15) 0.0638(15) 0.0044(12) -0.0070(12) -0.0019(12) 
N2 0.238(7) 0.100(3) 0.046(2) 0.003(2) 0.023(3) -0.080(4) 
C1 0.064(2) 0.081(2) 0.0534(18) 0.0094(17) 0.0060(16) 0.0050(18) 
C2 0.0530(16) 0.0535(15) 0.0482(15) 0.0033(13) 0.0036(13) -0.0009(13) 
C3 0.0512(15) 0.0470(15) 0.0513(15) 0.0050(13) 0.0021(13) -0.0044(12) 
C4 0.0489(15) 0.0582(17) 0.0491(15) 0.0018(13) 0.0002(12) -0.0122(13) 
C5 0.0531(15) 0.0511(15) 0.0494(15) 0.0083(13) -0.0039(13) -0.0060(12) 
C6 0.101(3) 0.075(2) 0.0485(18) 0.0000(17) 0.0067(18) -0.031(2) 
C7 0.087(2) 0.0606(18) 0.0549(17) 0.0100(17) 0.0016(17) 0.004(2) 
C8 0.179(6) 0.077(3) 0.104(4) 0.001(3) -0.001(4) -0.024(4) 
C9 0.106(3) 0.121(4) 0.079(3) 0.017(3) -0.005(2) 0.048(3) 
C10 0.074(2) 0.0532(17) 0.081(2) 0.0198(18) 0.001(2) -0.0059(15) 
C11 0.121(4) 0.061(2) 0.104(3) -0.015(2) 0.036(3) -0.006(2) 
C12 0.123(4) 0.107(4) 0.168(6) 0.078(4) -0.035(4) -0.009(4) 
C13 0.0458(14) 0.0517(16) 0.082(2) -0.0072(15) 0.0067(15) 0.0122(13) 
C14 0.074(3) 0.088(3) 0.109(3) -0.021(3) 0.031(3) 0.011(2) 
C15 0.066(2) 0.0540(18) 0.135(4) -0.021(2) 0.008(3) 0.0035(18) 
C16 0.075(2) 0.069(2) 0.113(3) 0.017(2) -0.009(2) 0.018(2) 
  
_geom_special_details 
; 
 All esds (except the esd in the dihedral angle between two l.s. planes) 
 are estimated using the full covariance matrix.  The cell esds are taken 
 into account individually in the estimation of esds in distances, angles 
 and torsion angles; correlations between esds in cell parameters are only 
 used when they are defined by crystal symmetry.  An approximate (isotropic) 
 treatment of cell esds is used for estimating esds involving l.s. planes. 
; 
  
loop_ 
 _geom_bond_atom_site_label_1 
 _geom_bond_atom_site_label_2 
 _geom_bond_distance 
 _geom_bond_site_symmetry_2 
 _geom_bond_publ_flag 
S1 O7 1.487(2) . ? 
S1 N1 1.648(3) . ? 
S1 C13 1.855(3) . ? 
O1 C1 1.410(4) . ? 
O1 C7 1.435(5) . ? 
O2 C2 1.425(4) . ? 
O2 C7 1.429(4) . ? 
O3 C3 1.427(4) . ? 
O3 C10 1.436(4) . ? 
O4 C4 1.399(4) . ? 
O4 C10 1.439(5) . ? 
O5 N2 1.168(10) . ? 
O6 N2 1.255(10) . ? 
N1 C5 1.446(4) . ? 
N2 C6 1.482(6) . ? 
C1 C2 1.512(4) . ? 
C2 C3 1.516(4) . ? 
C3 C4 1.521(4) . ? 
C4 C5 1.528(4) . ? 
C5 C6 1.521(5) . ? 
C7 C8 1.495(7) . ? 
C7 C9 1.502(6) . ? 
C10 C12 1.499(7) . ? 
C10 C11 1.507(6) . ? 
C13 C14 1.513(6) . ? 
C13 C16 1.519(6) . ? 
C13 C15 1.531(5) . ? 
  
loop_ 
 _geom_angle_atom_site_label_1 
 _geom_angle_atom_site_label_2 
 _geom_angle_atom_site_label_3 
 _geom_angle 
 _geom_angle_site_symmetry_1 
 _geom_angle_site_symmetry_3 
 _geom_angle_publ_flag 
O7 S1 N1 111.95(15) . . ? 
O7 S1 C13 106.03(15) . . ? 
N1 S1 C13 97.25(15) . . ? 
C1 O1 C7 106.2(3) . . ? 
C2 O2 C7 108.9(2) . . ? 
C3 O3 C10 109.8(2) . . ? 
C4 O4 C10 110.3(3) . . ? 
C5 N1 S1 120.7(2) . . ? 
O5 N2 O6 125.4(6) . . ? 
O5 N2 C6 119.5(8) . . ? 
O6 N2 C6 115.1(8) . . ? 
O1 C1 C2 102.6(3) . . ? 
O2 C2 C1 103.2(3) . . ? 
O2 C2 C3 108.9(3) . . ? 
C1 C2 C3 115.7(3) . . ? 
O3 C3 C2 110.4(3) . . ? 
O3 C3 C4 103.9(2) . . ? 
C2 C3 C4 113.2(3) . . ? 
O4 C4 C3 105.0(3) . . ? 
O4 C4 C5 112.3(3) . . ? 
C3 C4 C5 114.5(2) . . ? 
N1 C5 C6 110.3(3) . . ? 
N1 C5 C4 110.0(2) . . ? 
C6 C5 C4 108.2(3) . . ? 
N2 C6 C5 109.3(3) . . ? 
O2 C7 O1 105.6(3) . . ? 
O2 C7 C8 109.6(4) . . ? 
O1 C7 C8 110.4(4) . . ? 
O2 C7 C9 109.1(4) . . ? 
O1 C7 C9 107.2(3) . . ? 
C8 C7 C9 114.6(5) . . ? 
O3 C10 O4 105.7(3) . . ? 
O3 C10 C12 108.1(3) . . ? 
O4 C10 C12 109.5(4) . . ? 
O3 C10 C11 110.6(3) . . ? 
O4 C10 C11 107.0(3) . . ? 
C12 C10 C11 115.4(4) . . ? 
C14 C13 C16 112.9(3) . . ? 
C14 C13 C15 110.1(3) . . ? 
C16 C13 C15 110.6(4) . . ? 
C14 C13 S1 108.3(3) . . ? 
C16 C13 S1 110.1(3) . . ? 
C15 C13 S1 104.5(2) . . ? 
  
_diffrn_measured_fraction_theta_max    1.000 
_diffrn_reflns_theta_full              67.96 
_diffrn_measured_fraction_theta_full   1.000 
_refine_diff_density_max    0.282 
_refine_diff_density_min   -0.274 
_refine_diff_density_rms    0.052 
